# Supplementary material
Source: PubMed Central journal article supplement (PMC2336856)
Supplement: JCI0829226sd.pdf [file JCI0829226sd.pdf]

## Supplementary Table

Peripheral blood counts on erythrocyte and leukocyte

|                                   | <i>n</i> | RBC <sup>A</sup><br>Number<br>(x 10 <sup>4</sup> /mm <sup>3</sup> ) | Leukocyte cell<br>Number<br>(x 10 <sup>2</sup> /mm <sup>3</sup> ) | Differential White Blood Cell Count (%) |            |            |
|-----------------------------------|----------|---------------------------------------------------------------------|-------------------------------------------------------------------|-----------------------------------------|------------|------------|
|                                   |          |                                                                     |                                                                   | Lymphocyte                              | Monocyte   | Neutrophil |
| <b>Non-BMT<sup>B</sup> mice</b>   |          |                                                                     |                                                                   |                                         |            |            |
| WT                                | 9        | 1136 ± 47.8                                                         | 20 ± 0.3                                                          | 86.9 ± 0.96                             | 3.4 ± 0.38 | 9.2 ± 0.66 |
| <i>Rock1</i> <sup>+/-</sup>       | 4        | 1100 ± 136.6                                                        | 20 ± 1.2                                                          | 86.8 ± 1.11                             | 3.5 ± 0.29 | 9.5 ± 1.04 |
| <i>Rock2</i> <sup>+/-</sup>       | 5        | 1011 ± 96.4                                                         | 19 ± 0.73                                                         | 85.2 ± 0.8                              | 4.4 ± 0.51 | 9.6 ± 0.93 |
| <b>BMT mice</b>                   |          |                                                                     |                                                                   |                                         |            |            |
| WT to WT                          | 4        | 1182 ± 74.8                                                         | 21 ± 0.7                                                          | 85.8 ± 1.03                             | 4.3 ± 0.25 | 9.8 ± 0.85 |
| WT to <i>Rock1</i> <sup>+/-</sup> | 4        | 1352 ± 130.7                                                        | 20 ± 1.8                                                          | 86.5 ± 1.26                             | 3.5 ± 0.65 | 9.8 ± 0.85 |
| <i>Rock1</i> <sup>+/-</sup> to WT | 4        | 1249 ± 141.5                                                        | 22 ± 0.5                                                          | 87.3 ± 0.85                             | 4.0 ± 0.00 | 8.8 ± 0.85 |

<sup>A</sup>RBC = red blood cell; <sup>B</sup>BMT = bone marrow transplantation.

All results are presented as mean ± SEM.

# Supplementary Figure 1

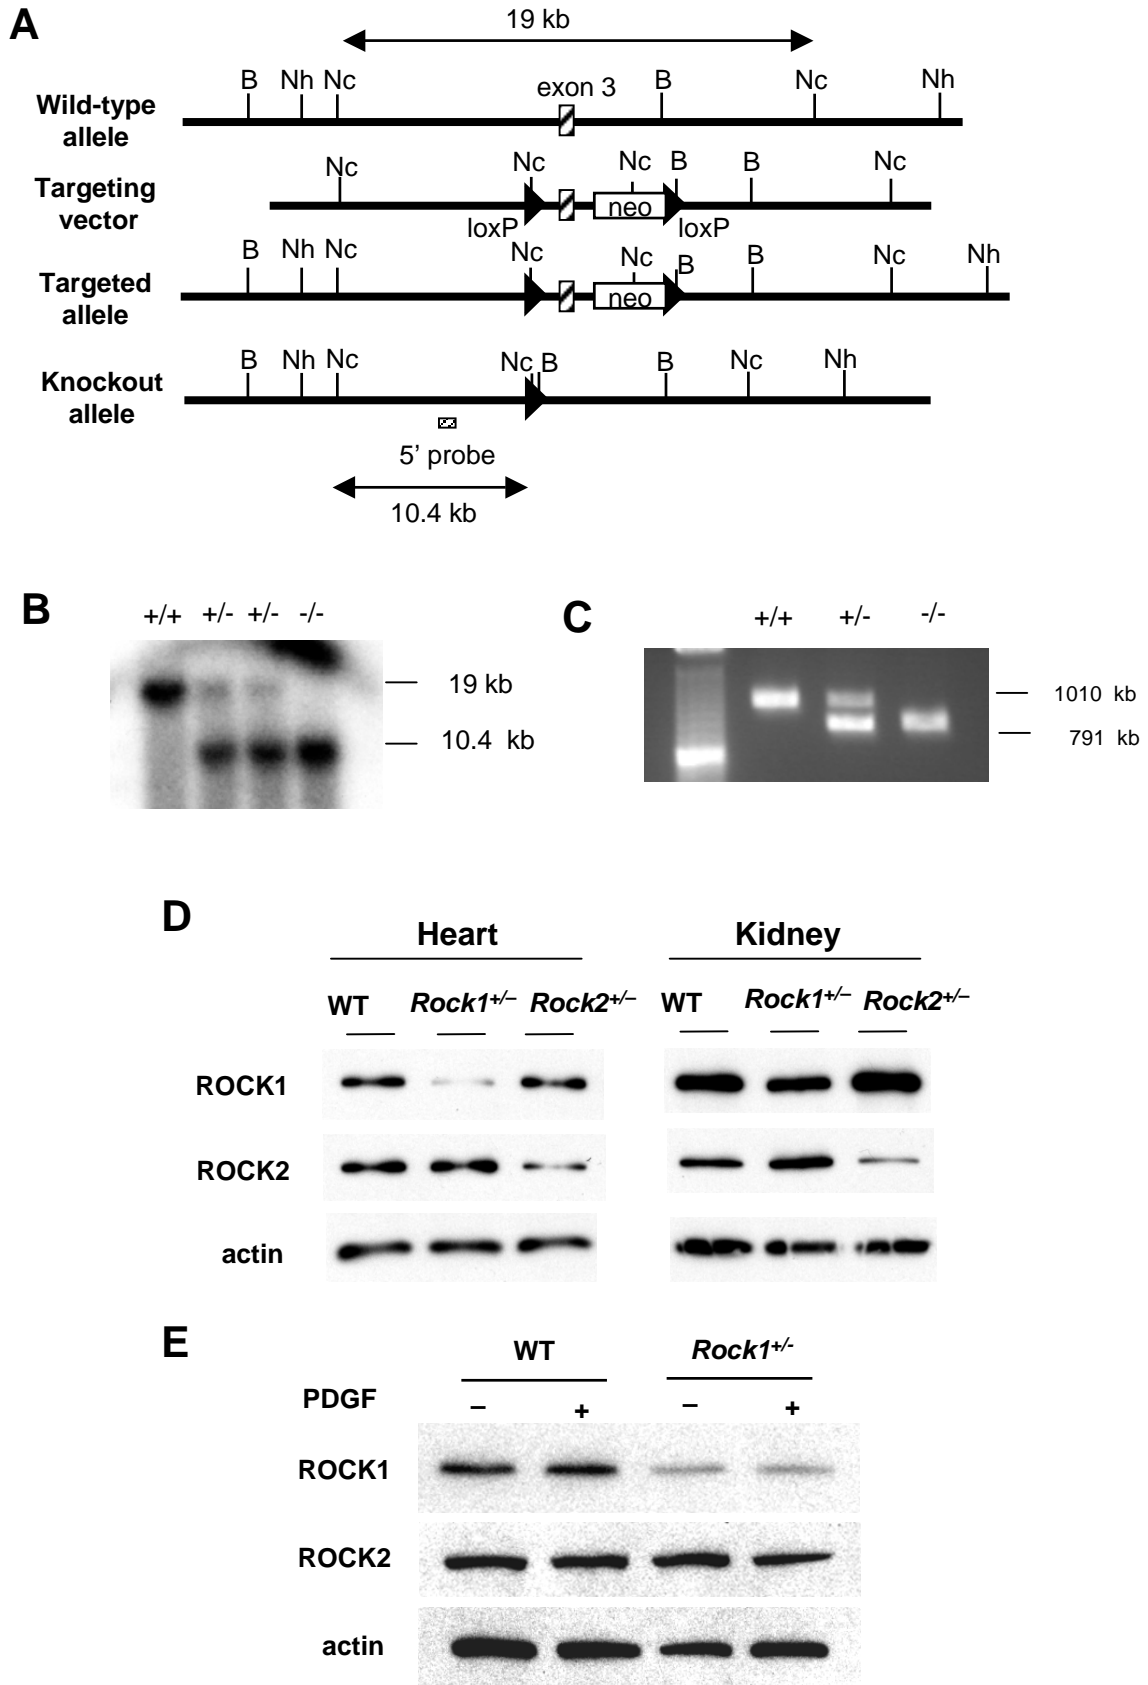

## Supplementary Figure 2

**A**

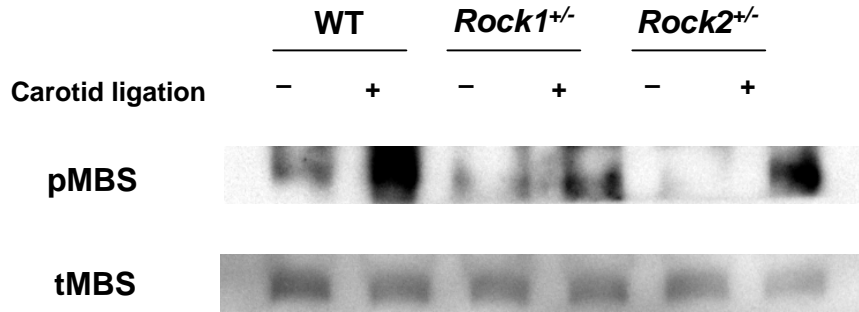

**B**

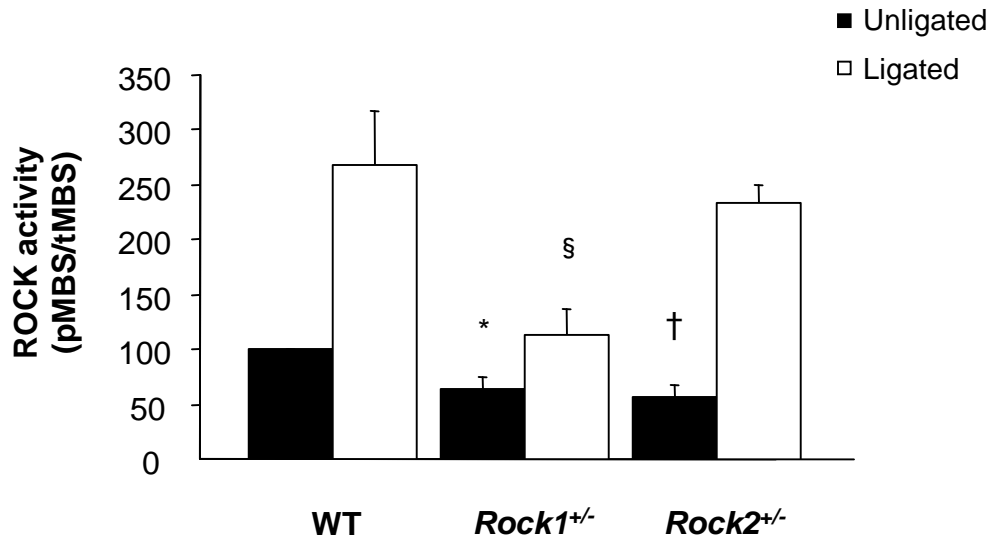

# Supplementary Figure 3

**A**

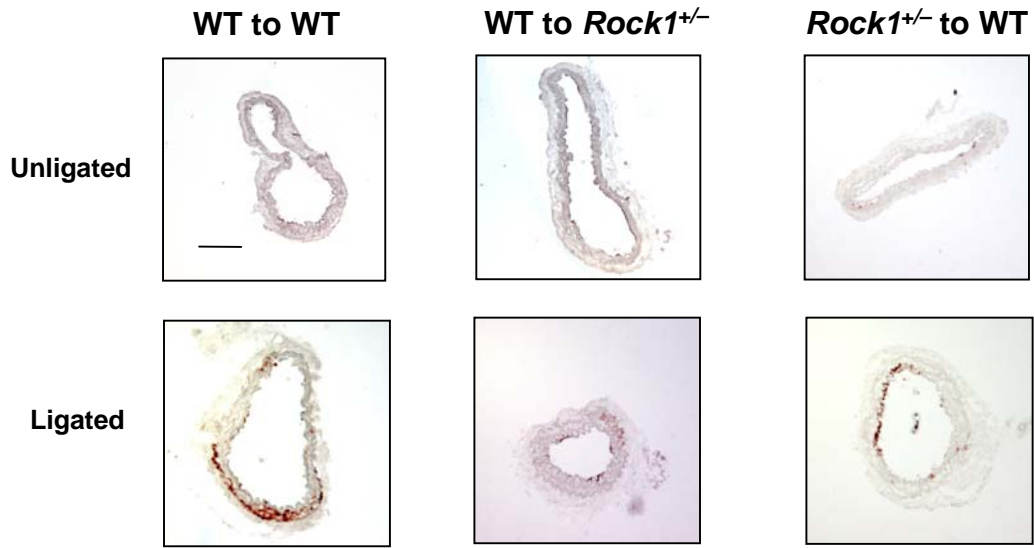

**B**

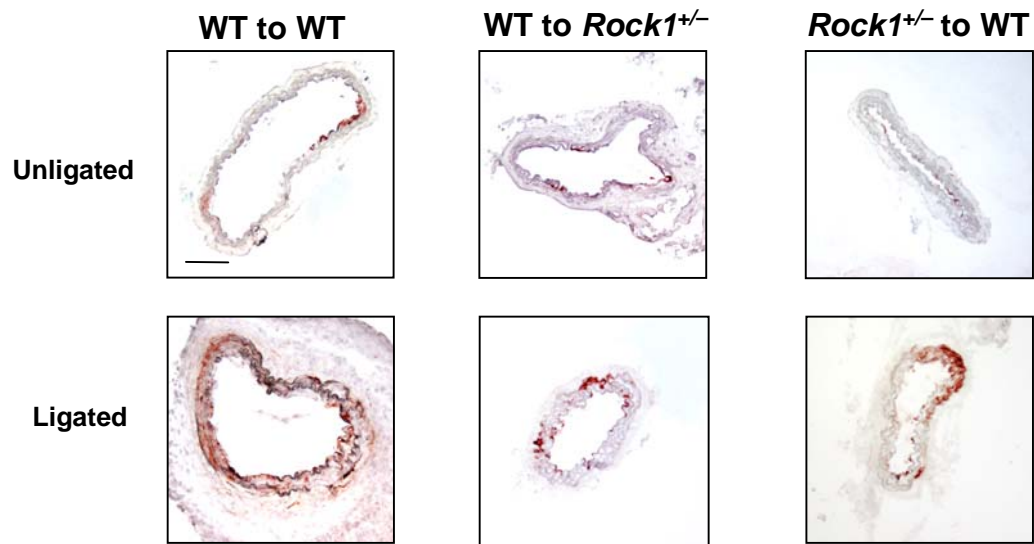

**C**

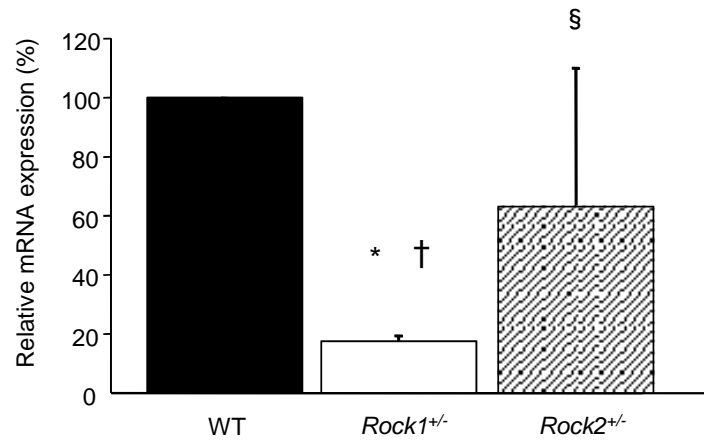

## Figure 1. Generation of *Rock2*-knockout allele

(A) Schematic of structures of the WT allele, targeting vector, targeted allele, and *Rock2*-knockout allele. The targeting vector containing loxP sites flanking exon3 of *Rock2* was injected into embryonic stem cells. The loxP-flanked exon 3 and pGK-Neo gene in correctly targeted clones were deleted by transfection with Cre. Shown are positions of neomycin resistance (neo), loxP sites (loxP); restriction enzyme sites for BamHI (B), NheI(Nh), and NcoI (Nc); and 5' genomic probe. (B) Southern blots showing the presence of WT (+) and deleted (-) *Rock2* allele. Genomic DNA was isolated from tails of WT (+/+), *Rock2*<sup>+/-</sup> (+/-), and *Rock2*<sup>-/-</sup> (-/-) mice, digested with NcoI, and subjected to Southern blots. (C) Genotyping by PCR analysis of genomic DNA. (D) Western blots showing the protein levels of ROCK1 and ROCK2. Proteins were extracted from hearts and kidneys of WT, *Rock1*<sup>+/-</sup>, and *Rock2*<sup>+/-</sup> mice and analyzed by Western blots using anti-ROCK1, anti-ROCK2, and anti-actin antibodies. (E) Representative result of Western blot analysis of ROCK1 and ROCK2 expression in VSMC of WT and *Rock1*<sup>+/-</sup> mice with or without PDGF stimulation for 5 minutes. Actin was used as an internal control.

## Figure 2. Decreased ROCK activity in ligated carotid arteries of *Rock1*<sup>+/-</sup> but not *Rock2*<sup>+/-</sup> mice.

(A) Representative Western blot of ligated and unligated carotid arteries from WT, *Rock1*<sup>+/-</sup>, and *Rock2*<sup>+/-</sup> mice using antibodies to phospho-MBS (pMBS) and total MBS (tMBS). (B) Quantification of ROCK activity as defined by the ratio of pMBS to tMBS. Mean ± SEM, n=6. \*P < 0.05 versus unligated carotid arteries from WT mice; †P < 0.01

versus unligated carotid arteries from WT mice;  $^{\S}P < 0.01$  versus ligated carotid arteries from WT and *Rock2*<sup>+/-</sup> mice.

**Figure 3. Decreased expression of endothelial adhesion molecules in WT to *Rock1*<sup>+/-</sup> BMT mice but not WT to WT BMT or *Rock1*<sup>+/-</sup> to WT BMT mice**

Representative histological sections from unligated and ligated carotid arteries in WT and *Rock1*<sup>+/-</sup> BMT mice stained for (A) ICAM-1 and (B) VCAM-1 at 7 days after ligation. Bar represents 100  $\mu$ m. (C) Real time PCR showing *Vla-4* mRNA expression in thioglycollate-induced macrophages from WT, *Rock1*<sup>+/-</sup>, and *Rock2*<sup>+/-</sup> mice. \* $P < 0.01$  versus macrophages from WT mice;  $^{\dagger}P < 0.05$  versus macrophages from *Rock2*<sup>+/-</sup> mice;  $^{\S}P < 0.05$  versus macrophages from WT mice.
